# Supplementary material
Source: PubMed Central journal article supplement (PMC3259261)
Supplement: NIHMS328530-supplement-01.pdf [file NIHMS328530-supplement-01.pdf]

## Addition of Ascorbic Acid to the Extracellular Environment Activates Lipoplexes of a Ferrocenyl Lipid and Promotes Cell Transfection

Burcu S. Aytar,<sup>a</sup> John P. E. Muller,<sup>a</sup> Sharon Golan,<sup>b</sup> Shinichi Hata,<sup>c</sup> Hiro Takahashi,<sup>c</sup> Yukishige Kondo,<sup>c</sup> Yeshayahu Talmon,<sup>b,\*</sup> Nicholas L. Abbott,<sup>a,\*</sup> and David M. Lynn<sup>a,\*</sup>

<sup>a</sup>Department of Chemical and Biological Engineering, University of Wisconsin - Madison, 1415 Engineering Drive, Madison, Wisconsin 53706. <sup>b</sup>Department of Chemical Engineering, Technion-Israel Institute of Technology, Haifa 32000, Israel. <sup>c</sup>Department of Industrial Chemistry, Tokyo University of Science, Tokyo, Japan

### Supplementary Data

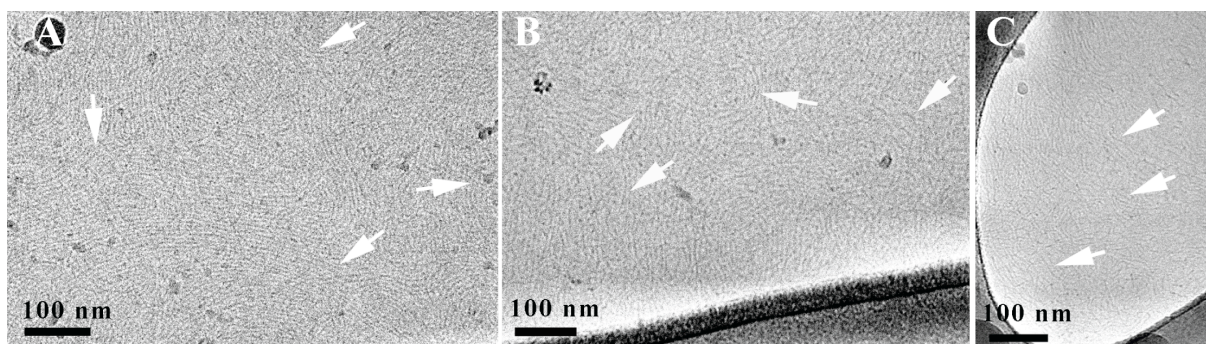

**Figure S1:** Additional cryo-TEM images acquired during characterization of the samples of A) lipoplexes of oxidized BFDMA that were treated with AA and B) lipoplexes of oxidized BFDMA (both in Opti-MEM cell culture medium) used to acquire images shown in Figures 7B-D of the main text. The images were acquired in an area of the sample where lipoplexes were absent and show the presence of DNA threadlike structures in solution. C) Cryo-TEM image of a solution of plasmid DNA encoding EGFP (2.9 mg/ml in water). The arrows in images point at DNA threads dispersed in the solution.
